# Supplementary material for: Uniform nickel–cobalt nanoparticles embedded in nitrogen-doped carbon nanofibers for highly active and durable oxygen reduction electrocatalysts
Source: Royal Society of Chemistry journal article supplement (doi:10.1039/d0nj06191c), 2021-01-01
Supplement: d0nj06191c1.pdf [file d0nj06191c1.pdf]

## Supporting Information

# Uniform nickel-cobalt nanoparticles embedded nitrogen-doped carbon nanofibers for highly active and durable oxygen reduction electrocatalysts

*Jingyu Song<sup>a‡</sup>, Xuan Xie<sup>a‡</sup>, Kanjun Sun<sup>b</sup>, Mingxin Zhang<sup>a</sup>, Haikuo Lei<sup>a</sup>, Hui Peng<sup>\*a</sup>, Guofu Ma<sup>\*a</sup>*

<sup>a</sup>Key Laboratory of Eco-functional Polymer Materials of the Ministry of Education, Key Laboratory of Polymer Materials of Gansu Province, College of Chemistry and Chemical Engineering, Northwest Normal University, Lanzhou 730070, China.

<sup>b</sup> College of Chemistry and Chemical Engineering, Lanzhou City University, Lanzhou 730070, China.

<sup>‡</sup>These authors contributed equally to this work. They should thus be considered co-first authors.

<sup>\*</sup>Corresponding authors. E-mail addresses: penghui@nwnu.edu.cn (H. Peng), magf@nwnu.edu.cn (G. Ma)

## **S1. Materials characterizations**

The morphology and microstructure of the as-prepared carbon materials were examined by field emission scanning electron microscopy (FE-SEM, Carl Zeiss-Ultra Plus, Germany) and transmission electron microscopy (TEM, FEI Tecnai G2 F20 S-Twin, USA). The crystallographic structure of the materials was determined by X-ray diffraction (XRD, D/Max-2400, Rigaku) equipped with CuK $\alpha$  radiation ( $k = 1.5418 \text{ \AA}$ ). Raman spectra were collected on an in Via Raman spectrometer (Rainie Salt Public Co. Ltd., Britain) with a laser wavelength of 514 nm. The elemental (C, O, N, Co, Ni and P) microanalysis was carried out using the Elemental Analyzer Vario EL. X-ray photoelectron spectroscopy (XPS) measurement was performed on an Escalab 210 system (Germany) with Al K $\alpha$  radiation source. The Brunauer-Emmett-Teller (BET) surface area of the samples was analyzed by nitrogen adsorption-desorption in a surface area and porosimetry analyzer (ASAP 2020, Micromeritics, U.S.A.).

### **Calibration of RHE electrode:**

In this work, Hg/HgO (1 M KOH solution) electrode was used as reference electrode for all measurements. All measured potentials were calibrated to the reversible hydrogen electrode (RHE) as described in literature at 25°C. The calibration was conducted with a standard three-electrode system in the highly pure hydrogen saturated 0.1 M KOH solution. Two polished Pt wire were used as the counter and working electrodes, respectively. The thermodynamic potential was determined by cyclic voltammetry (CV) and linear scanning voltammetry (LSV) scan at a scan rate of 1 mV s<sup>-1</sup>. The potential at zero current was regarded as the thermodynamic potential for the hydrogen electrode reactions.

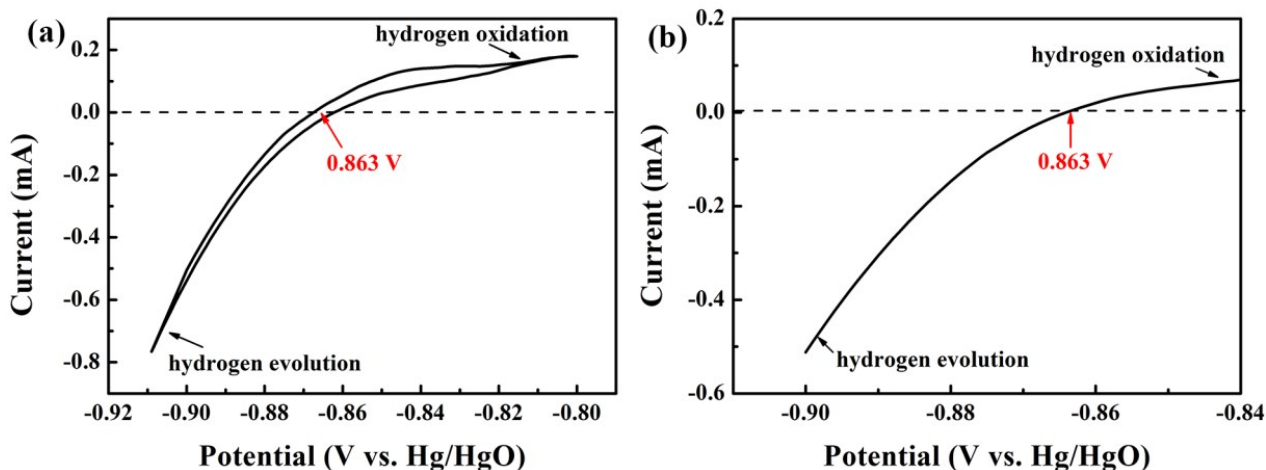

In 0.1 M KOH solution, the zero current point is at -0.863 V, so  $E(\text{RHE}) = E(\text{Hg}/\text{HgO}) + 0.863$ .

## S2. Electrochemical measurements

All ORR performance data using a rotating disk electrode (RDE, PINE Research Instrumentation) with an Autolab bipotentiostat (Model PGSTAT128N) workstation at ambient temperature. All tests were carried out using a three-electrode system, a Pt wire as counter electrode, Hg/HgO (1 M KOH) as reference electrode and glassy carbon (GC) disk electrode (5 mm in diameter) are used as the working electrodes.

The preparation of the working electrode is as follows: 5 mg catalyst was added to 1 ml Nafion/ethanol and ultrasonic dispersion for 30 min. Measuring 8  $\mu\text{l}$  drop onto the working electrode and waiting for natural dry (The catalyst loading is 0.2038  $\text{mg cm}^{-2}$ ). Before tests, 0.1 M KOH solution should be saturated with  $\text{N}_2/\text{O}_2$ .

Calculate kinetic current density ( $J_k$ ) and electronic transfer number ( $n$ ) according to the equation Koutecky-Levich given below:

$$\frac{1}{J} = \frac{1}{J_k} + \frac{1}{B\omega^{1/2}} \quad (1)$$

$$B = 0.2nFD_0^{2/3}V^{-1/6}C_0 \quad (2)$$

where  $J$  and  $J_k$  are the measured current density and the kinetic current density, respectively.  $\omega$  is the

electrode rotation speed,  $B$  could be determined from the slope of the K-L plots,  $n$  is the number of electrons transferred per oxygen molecule,  $F$  is the Faraday constant ( $96485 \text{ C mol}^{-1}$ ),  $D_0$  is the diffusion coefficient of  $\text{O}_2$  ( $1.9 \times 10^{-5} \text{ cm}^2 \text{ s}^{-1}$ ),  $\nu$  is the kinetic viscosity ( $0.01 \text{ cm}^2 \text{ s}^{-1}$ ), and  $C_0$  is the concentration of  $\text{O}_2$  ( $1.2 \times 10^{-6} \text{ mol cm}^{-3}$ ).

For the RRDE tests, the  $n$  and hydrogen peroxide yield ( $\% \text{H}_2\text{O}_2$ ) were calculated by the following equations:

$$n = \frac{4I_D}{I_D + (I_R / N)} \quad (3)$$

$$\% \text{H}_2\text{O}_2 = \frac{200I_R / N}{I_D + (I_R / N)} \quad (4)$$

where  $I_D$  is the disk current,  $I_R$  is the ring current,  $N$  (37%) is the current collection coefficient at the Pt ring.

**Fabrication of Zn-air batteries:** Primary Zn-air batteries were fabricated and evaluated at ambient conditions. Typically, a polished Zn foil (0.2 mm thickness) was employed as the anode. The air electrode was prepared by drop-casting as-prepared catalyst ink onto hydrophobic carbon paper (Fuel Cell Store, effective area =  $2 \text{ cm}^2$ ), yielding a catalyst loading of  $1.0 \text{ mg cm}^{-2}$ . Waterproof and breathable membrane and Ni foam were used as gas diffusion layer (GDL) and current collector, respectively. The electrolyte was 6 M KOH aqueous solutions. The discharge polarization curve was recorded by LSV at a scan rate of  $5 \text{ mV s}^{-1}$  on an Autolab electrochemical workstation. The specific capacity ( $\text{mAh g}^{-1}$ ) of  $\text{Ni}_{0.5}\text{Co}_1\text{@NCNFs}$  and Pt/C were calculated based on the following equations<sup>2</sup>:

$$\text{Specific capacity} = \frac{\text{discharge current} \times \text{working time}}{\text{mass of consumed zinc}} \quad (5)$$

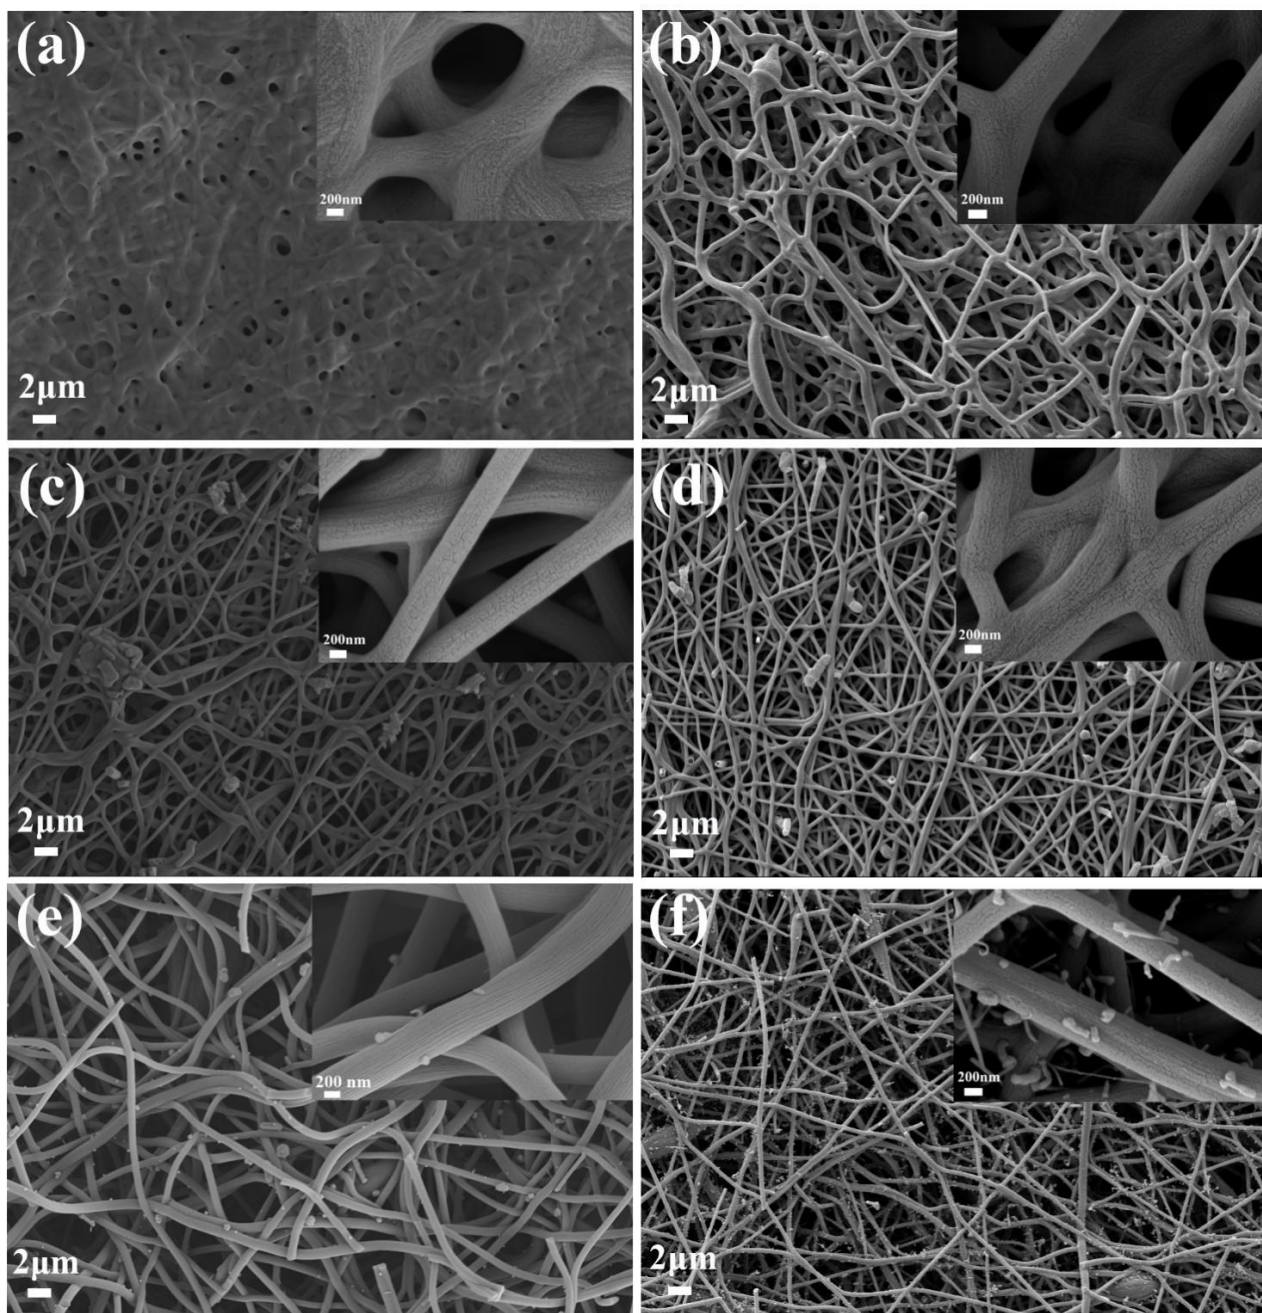

**Fig. S1** SEM image of (a) NCNFs; (b) Ni<sub>0.5</sub>@NCNFs; (c) Co<sub>1</sub>@NCNFs; (d) Ni<sub>0.5</sub>Co<sub>0.5</sub>@NCNFs; (e) Ni<sub>0.5</sub>Co<sub>1</sub>@NCNFs, (f) Ni<sub>0.5</sub>Co<sub>1.5</sub>@NCNFs.

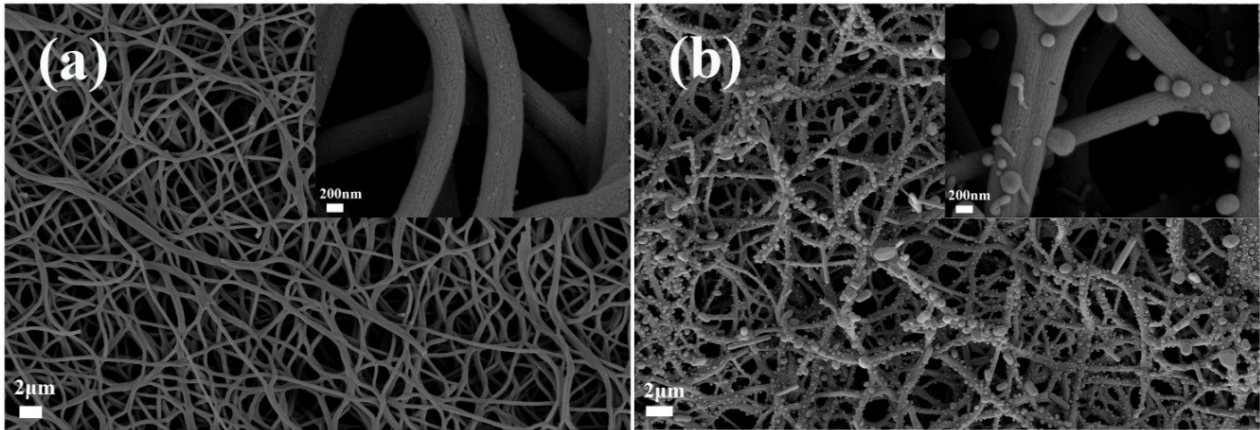

Fig. S2 SEM image of (a)  $\text{Ni}_{0.5}\text{Co}_1\text{@NCNFs-800}$ ; (b)  $\text{Ni}_{0.5}\text{Co}_1\text{@NCNFs-1000}$ .

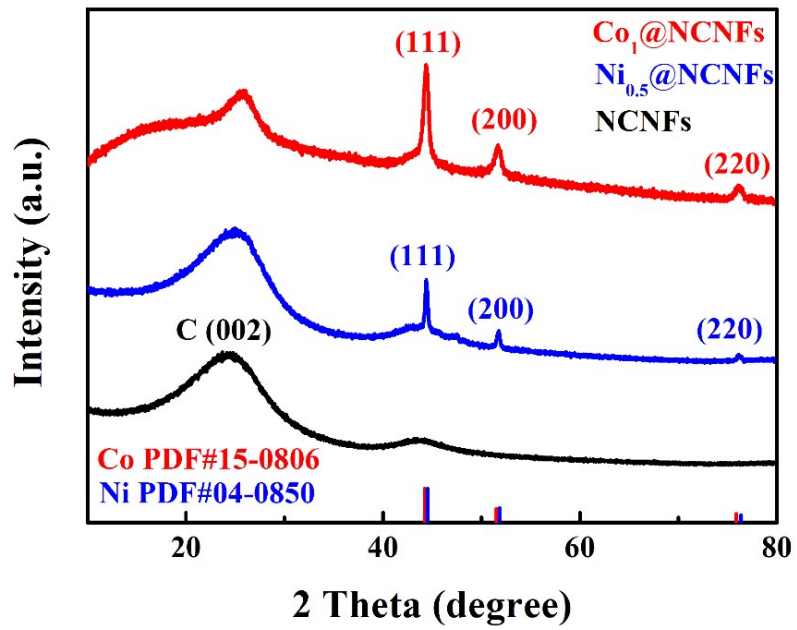

Fig. S3 XRD pattern of NCNFs,  $\text{Ni}_{0.5}\text{@NCNFs}$  and  $\text{Co}_1\text{@NCNFs}$ .

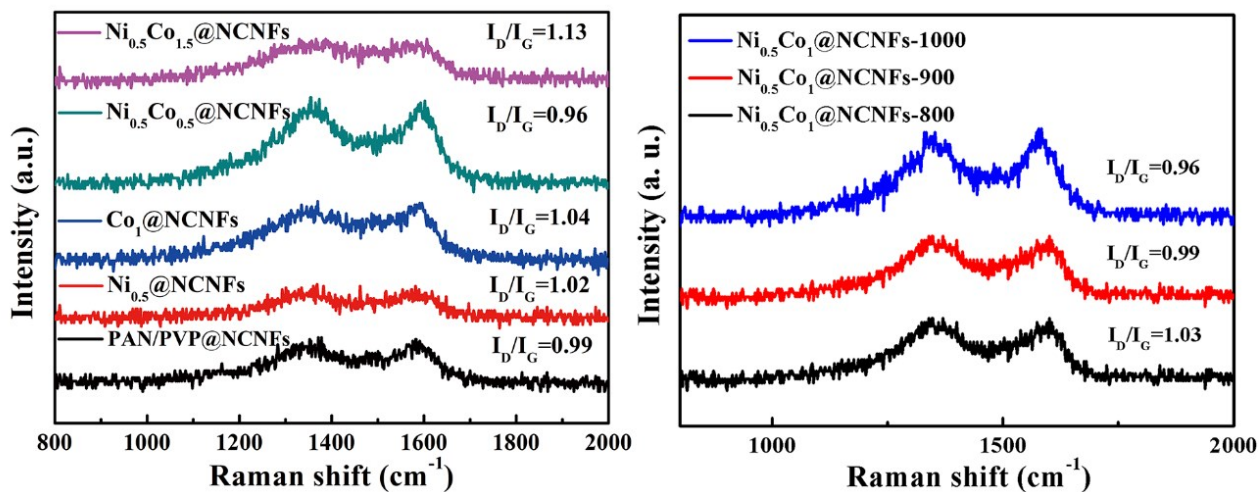

**Fig. S4** (a) Raman spectra of NiCo@NCNFs carbonized at different mole ratio of Ni<sup>2+</sup>/Co<sup>2+</sup> and Ni<sub>0.5</sub>Co<sub>1</sub>@NCNFs carbonized at different carbonization temperatures.

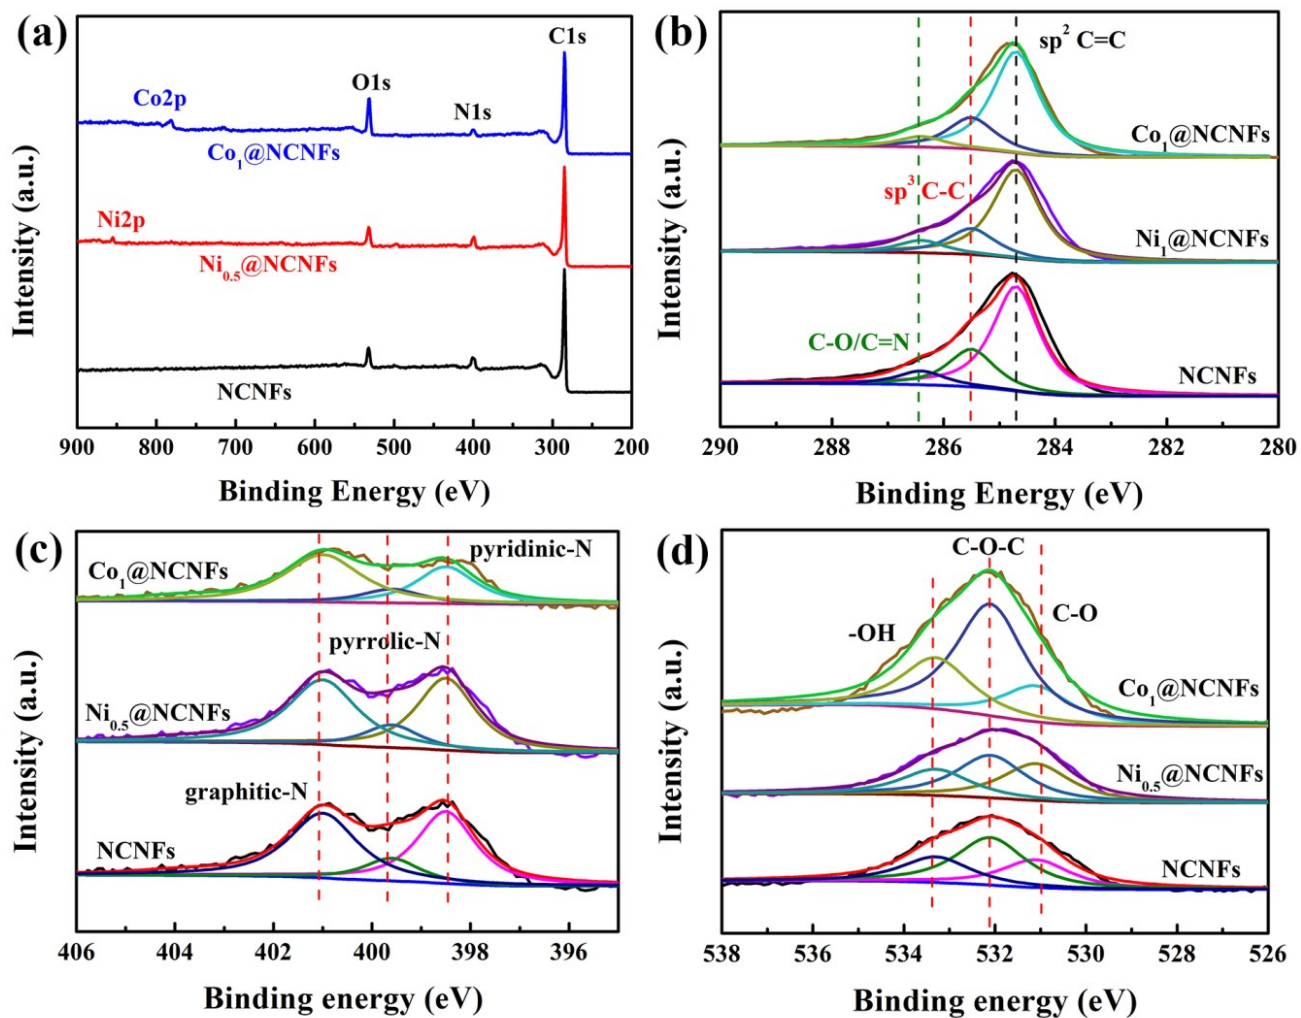

**Figure S5.** XPS survey spectra (a) of NCNFs, Ni<sub>0.5</sub>@NCNFs and Co<sub>1</sub>@NCNFs, High-resolution XPS spectra of (b) C1s, (c) N1s and (d) O1s.



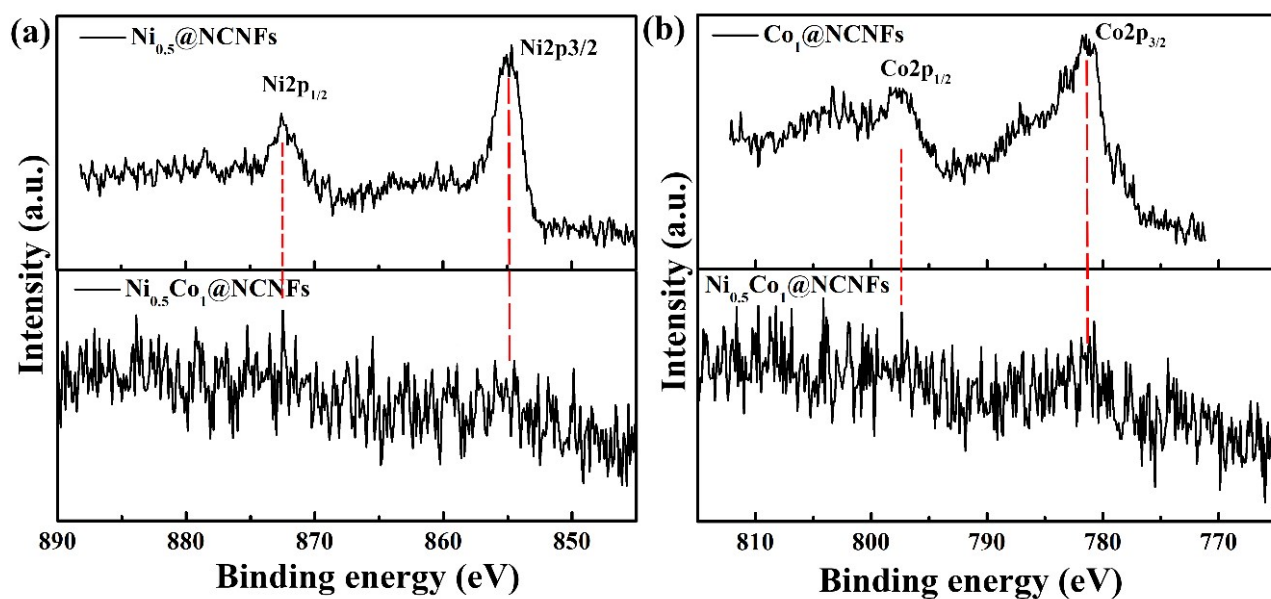

**Fig. S6** XPS characterization of  $\text{Ni}_{0.5}\text{@NCNFs}$ ,  $\text{Co}_1\text{@NCNFs}$  and  $\text{Ni}_{0.5}\text{Co}_1\text{@NCNFs}$  (a) Ni2p, (b) Co2p.

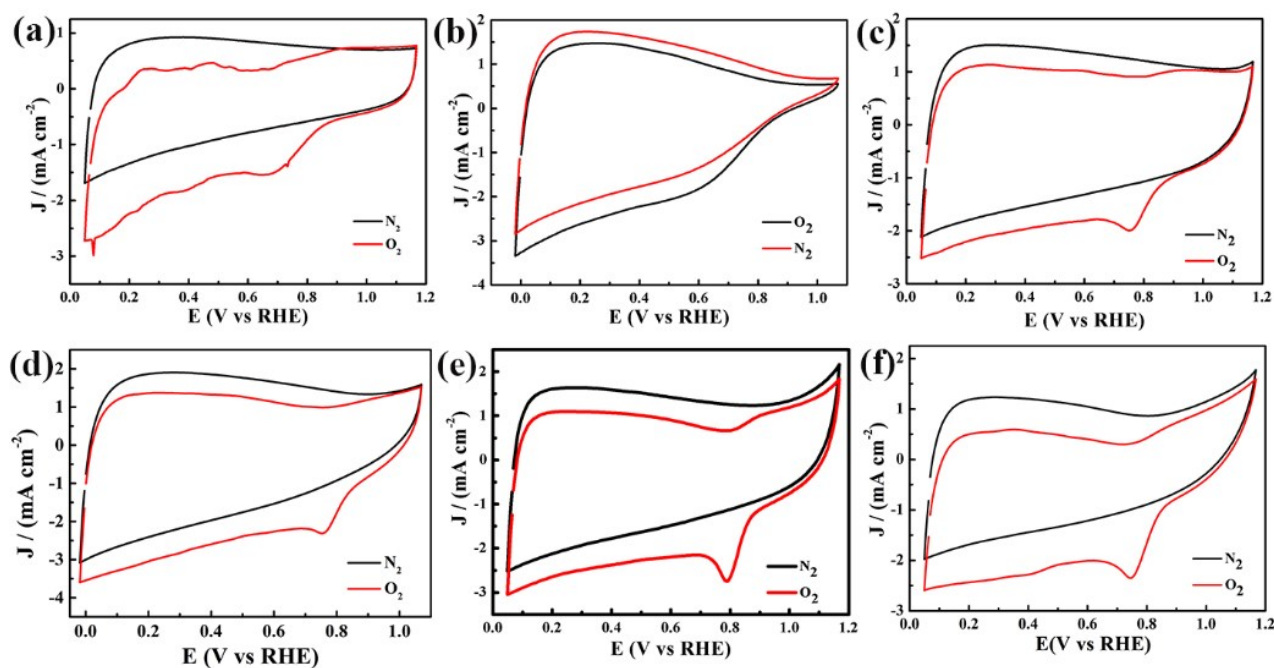

**Fig. S7** CV curves of NCNFs and NiCo@NCNFs electrocatalysts in  $\text{O}_2$ -saturated 0.1 M KOH (scan rate:  $50 \text{ mV s}^{-1}$ ).

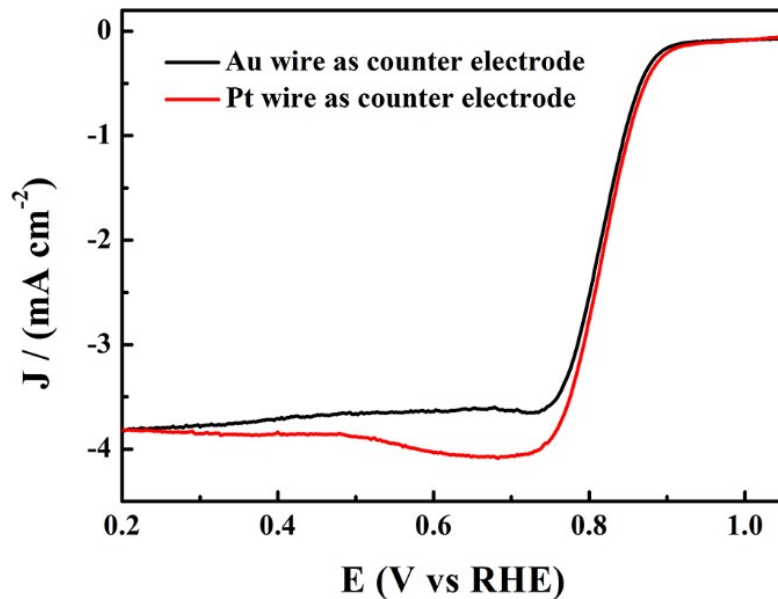

**Fig. S8** LSV curve of  $\text{Ni}_{0.5}\text{Co}_1$ @NCNFs in  $\text{O}_2$ -saturated 0.1 M KOH using the different counter electrode.

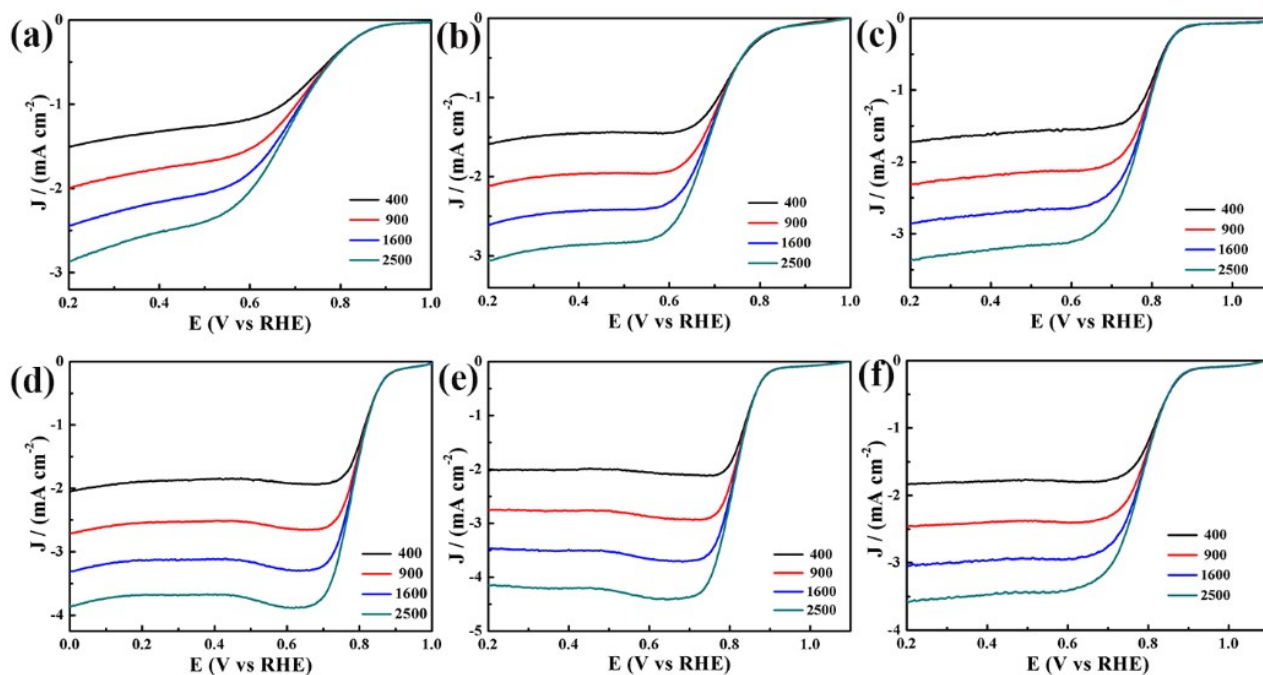

**Fig. S9** LSV curves of (a) NCNFs; (b)  $\text{Ni}_{0.5}$ @NCNFs; (c)  $\text{Co}_1$ @NCNFs; (d)  $\text{Ni}_{0.5}\text{Co}_{0.5}$ @NCNFs; (e)  $\text{Ni}_{0.5}\text{Co}_1$ @NCNFs; (f)  $\text{Ni}_{0.5}\text{Co}_{1.5}$ @NCNFs in  $\text{O}_2$ -saturated 0.1 M KOH (scan rate:  $5 \text{ mV s}^{-1}$ ) with various rotation rates.

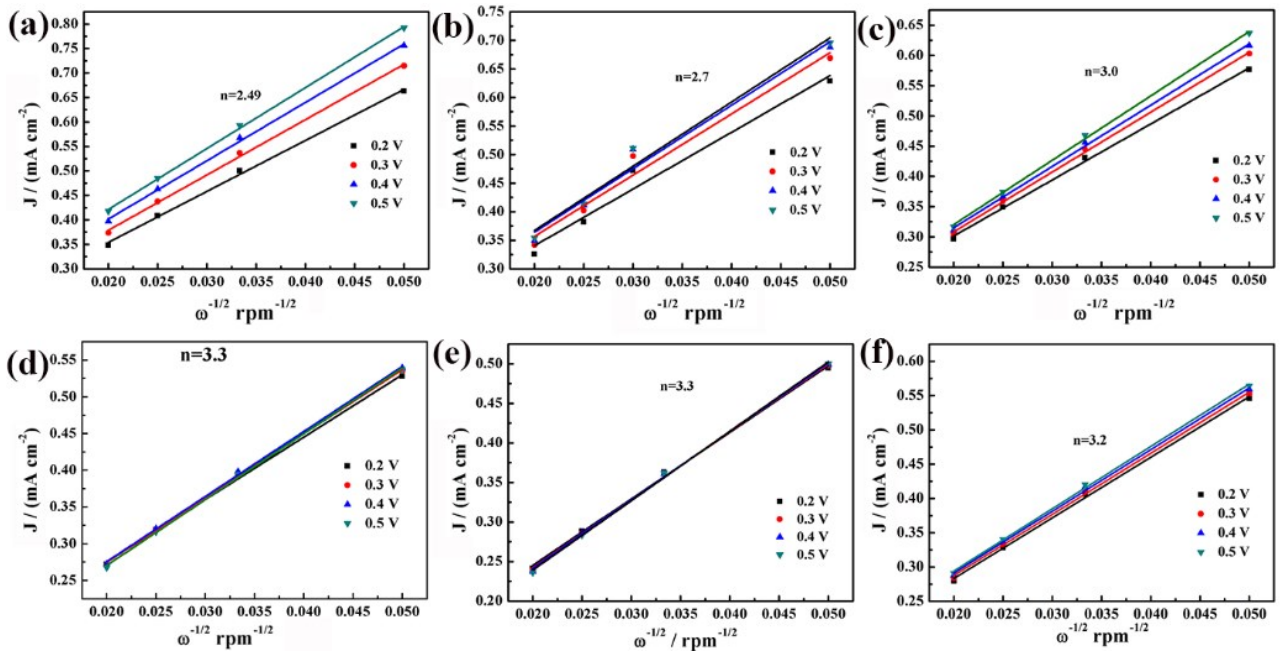

**Fig. S10** The K-L plots of (a) NCNFs; (b) Ni<sub>0.5</sub>@NCNFs; (c) Co<sub>1</sub>@NCNFs; (d) Ni<sub>0.5</sub>Co<sub>0.5</sub>@NCNFs; (e) Ni<sub>0.5</sub>Co<sub>1</sub>@NCNFs; (f) Ni<sub>0.5</sub>Co<sub>1.5</sub>@NCNFs at different potentials.

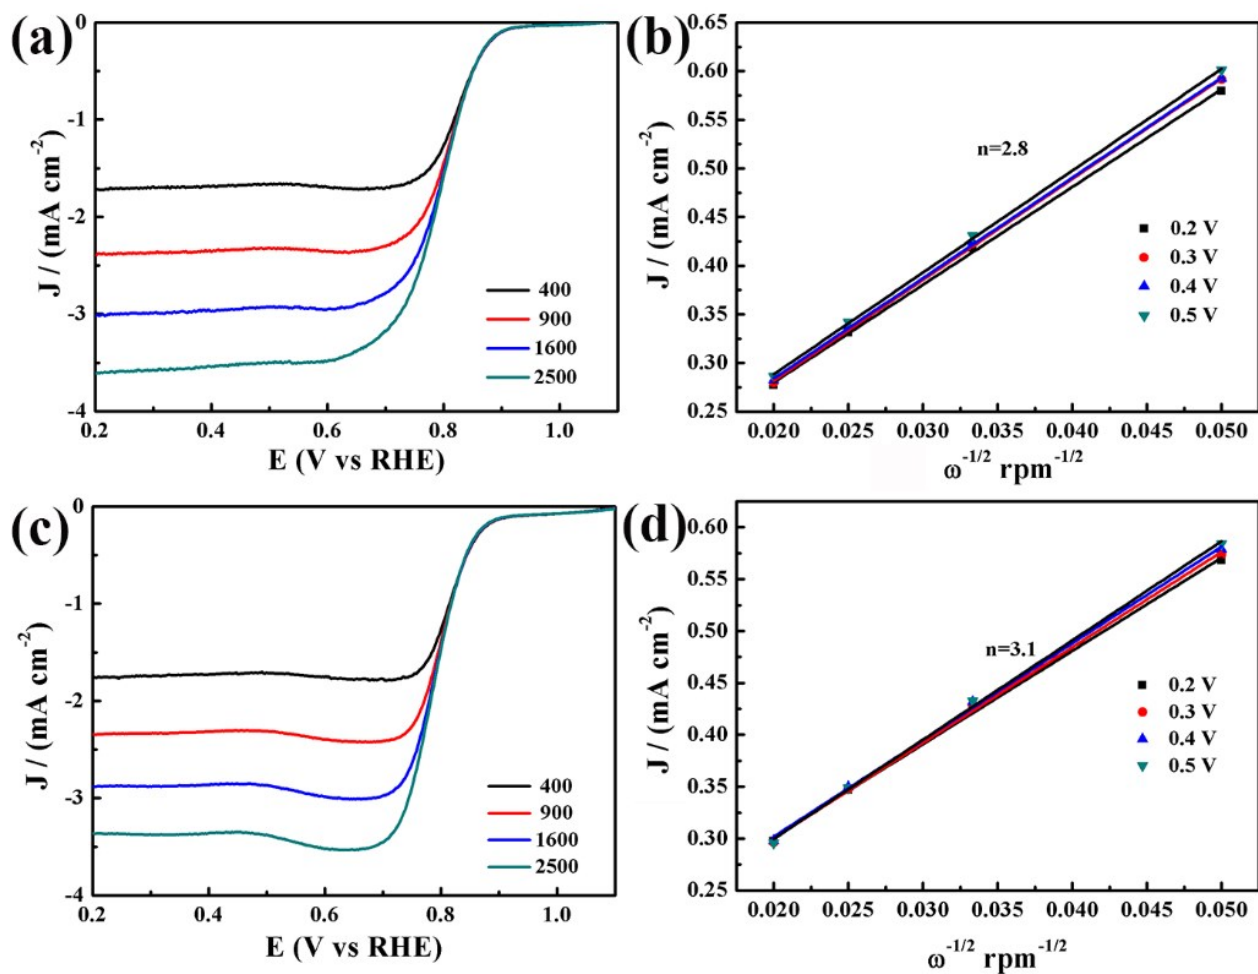

**Fig. S11** (a) Ni<sub>0.5</sub>Co<sub>1</sub>@NCNFs-800 in O<sub>2</sub>-saturated 0.1 M KOH (scan rate: 50 mV s<sup>-1</sup>) with various rotation rates. The K-L plots of (b) Ni<sub>0.5</sub>Co<sub>1</sub>@NCNFs-800. (c) Ni<sub>0.5</sub>Co<sub>1</sub>@NCNFs-1000 in O<sub>2</sub>-saturated 0.1 M KOH (scan rate: 50 mV s<sup>-1</sup>) with various rotation rates. The K-L plots of (d) Ni<sub>0.5</sub>Co<sub>1</sub>@NCNFs-1000.

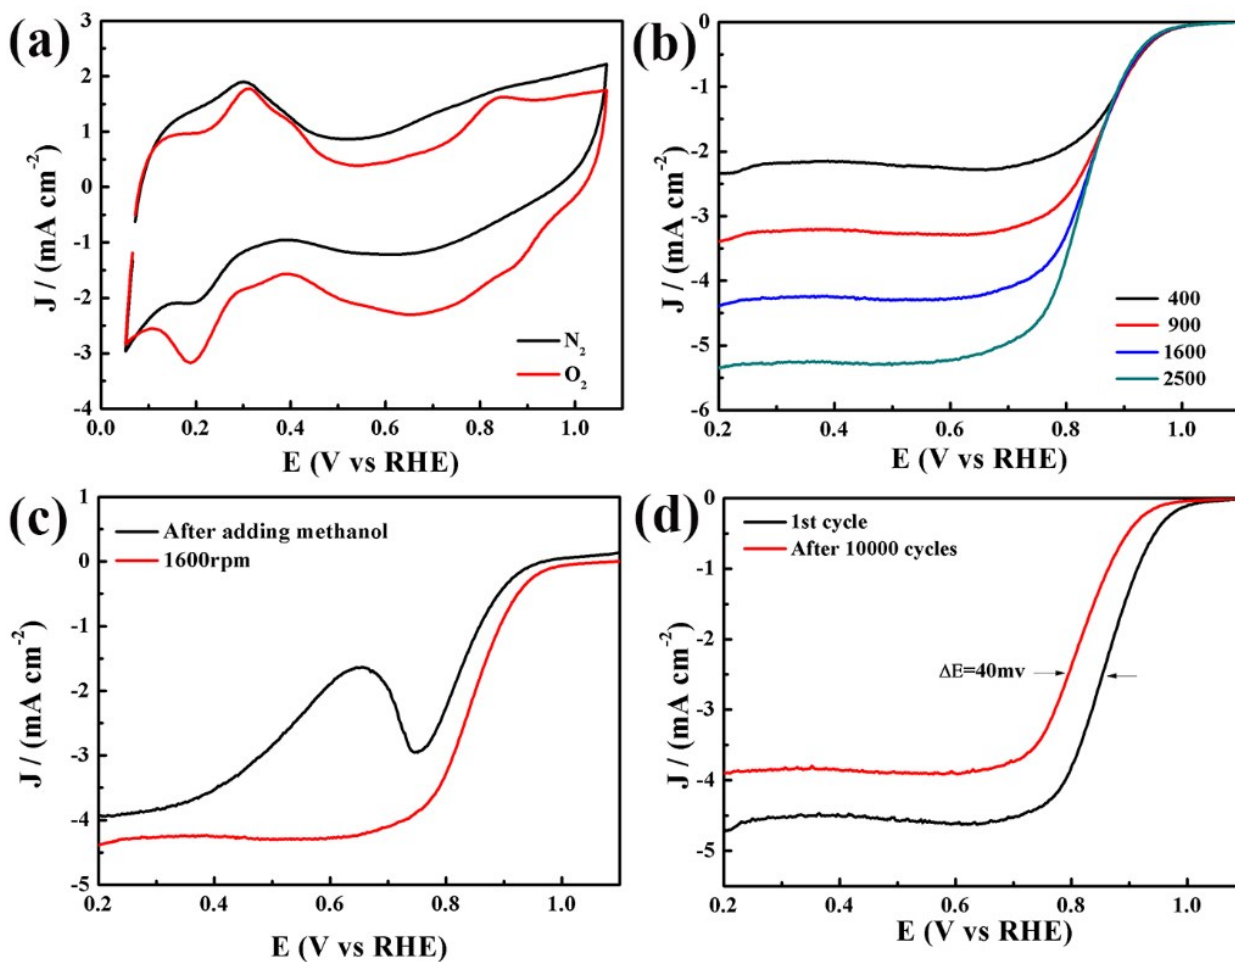

**Fig. S12** (a) CV curves of 20% Pt/C in  $N_2$ -saturated and  $O_2$ -saturated 0.1 M KOH (scan rate:  $50 \text{ mV s}^{-1}$ ). (b) LSV curves of 20% Pt/C in  $O_2$ -saturated 0.1 M KOH (scan rate:  $50 \text{ mV s}^{-1}$ ) with various rotation rates. (c) ORR polarization curves of 20% Pt/C in  $O_2$ -saturated 0.1 M KOH with and without 0.5 M  $CH_3OH$  at 1600 rpm. (d) ORR polarization curve before and after 10000 cycles of the 20% Pt/C.

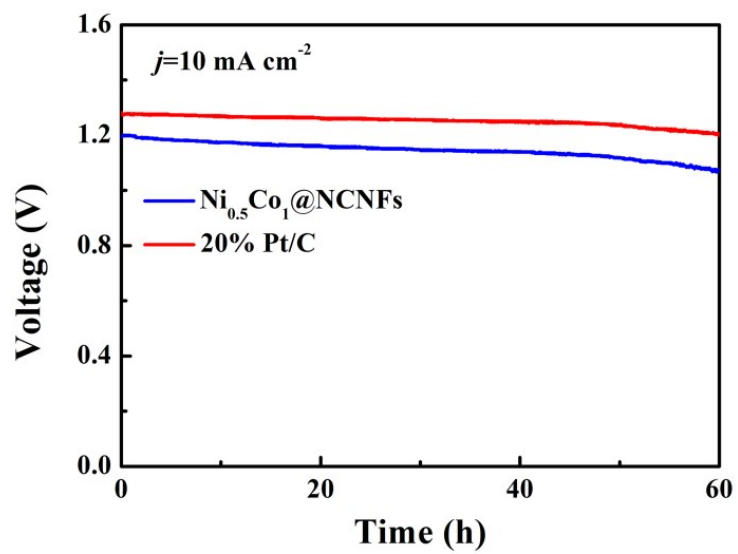

**Fig. S13.** Long time galvanostatic discharge curves of a Zn-air battery.
